# Supplementary material for: Magnetic study and DFT analysis of a doubly carboxylato-bridged Co(ii) derivative anchored with a ‘scorpionate’ precursor as a potential electrocatalyst for heterogeneous H2 evolution
Source: Royal Society of Chemistry journal article supplement (doi:10.1039/d4dt00807c), 2024-01-01
Supplement: d4dt00807c2.pdf [file d4dt00807c2.pdf]

**Table S1.** Excitation energies and oscillator strengths:

|                          |                |                  |                  |                 |                            |
|--------------------------|----------------|------------------|------------------|-----------------|----------------------------|
| Excited State 1:         | 7.004-A        | 0.5648 eV        | 2195.17 nm       | f=0.0000        | <S**2>=12.012              |
| Excited State 2:         | 7.004-A        | 0.5656 eV        | 2191.95 nm       | f=0.0001        | <S**2>=12.012              |
| Excited State 3:         | 7.004-A        | 1.0073 eV        | 1230.89 nm       | f=0.0000        | <S**2>=12.013              |
| Excited State 4:         | 7.004-A        | 1.0126 eV        | 1224.39 nm       | f=0.0001        | <S**2>=12.013              |
| Excited State 5:         | 7.003-A        | 1.1632 eV        | 1065.89 nm       | f=0.0000        | <S**2>=12.012              |
| Excited State 6:         | 7.003-A        | 1.1645 eV        | 1064.66 nm       | f=0.0001        | <S**2>=12.012              |
| Excited State 7:         | 7.005-A        | 1.5699 eV        | 789.74 nm        | f=0.0000        | <S**2>=12.016              |
| Excited State 8:         | 7.005-A        | 1.5703 eV        | 789.55 nm        | f=0.0001        | <S**2>=12.016              |
| Excited State 9:         | 7.004-A        | 1.8356 eV        | 675.44 nm        | f=0.0000        | <S**2>=12.014              |
| Excited State 10:        | 7.004-A        | 1.8451 eV        | 671.96 nm        | f=0.0002        | <S**2>=12.014              |
| Excited State 11:        | 7.004-A        | 2.1177 eV        | 585.46 nm        | f=0.0000        | <S**2>=12.015              |
| <b>Excited State 12:</b> | <b>7.004-A</b> | <b>2.1409 eV</b> | <b>579.11 nm</b> | <b>f=0.0033</b> | <b>&lt;S**2&gt;=12.014</b> |
| Excited State 13:        | 7.054-A        | 3.6703 eV        | 337.81 nm        | f=0.0000        | <S**2>=12.188              |
| Excited State 14:        | 7.053-A        | 3.6709 eV        | 337.75 nm        | f=0.0001        | <S**2>=12.186              |
| Excited State 15:        | 7.074-A        | 3.7033 eV        | 334.80 nm        | f=0.0754        | <S**2>=12.259              |
| Excited State 16:        | 7.073-A        | 3.7044 eV        | 334.70 nm        | f=0.0001        | <S**2>=12.256              |
| Excited State 17:        | 7.047-A        | 3.7197 eV        | 333.32 nm        | f=0.0010        | <S**2>=12.164              |
| Excited State 18:        | 7.045-A        | 3.7248 eV        | 332.86 nm        | f=0.0000        | <S**2>=12.160              |
| Excited State 19:        | 7.050-A        | 3.8985 eV        | 318.03 nm        | f=0.0023        | <S**2>=12.177              |
| Excited State 20:        | 7.047-A        | 3.8993 eV        | 317.97 nm        | f=0.0000        | <S**2>=12.166              |
| Excited State 21:        | 7.448-A        | 3.9902 eV        | 310.72 nm        | f=0.0043        | <S**2>=13.617              |
| Excited State 22:        | 7.452-A        | 3.9923 eV        | 310.56 nm        | f=0.0000        | <S**2>=13.634              |
| Excited State 23:        | 7.485-A        | 4.0340 eV        | 307.35 nm        | f=0.0036        | <S**2>=13.755              |
| Excited State 24:        | 7.493-A        | 4.0346 eV        | 307.30 nm        | f=0.0000        | <S**2>=13.788              |

Excited State 25: 7.062-A 4.1696 eV 297.36 nm f=0.0000 <S\*\*2>=12.217  
Excited State 26: 7.059-A 4.1706 eV 297.28 nm f=0.0023 <S\*\*2>=12.206  
Excited State 27: 7.088-A 4.1784 eV 296.73 nm f=0.0000 <S\*\*2>=12.311  
**Excited State 28: 7.091-A 4.1866 eV 296.14 nm f=0.0344 <S\*\*2>=12.320**  
**Excited State 29: 7.065-A 4.2360 eV 292.69 nm f=0.0269 <S\*\*2>=12.229**  
Excited State 30: 7.113-A 4.2384 eV 292.53 nm f=0.0000 <S\*\*2>=12.398  
Excited State 31: 7.140-A 4.2470 eV 291.94 nm f=0.0000 <S\*\*2>=12.495  
Excited State 32: 7.207-A 4.2671 eV 290.56 nm f=0.0052 <S\*\*2>=12.735  
Excited State 33: 7.097-A 4.3371 eV 285.87 nm f=0.0030 <S\*\*2>=12.344  
Excited State 34: 7.063-A 4.3472 eV 285.20 nm f=0.0000 <S\*\*2>=12.220  
Excited State 35: 7.267-A 4.3697 eV 283.74 nm f=0.0000 <S\*\*2>=12.952  
Excited State 36: 7.156-A 4.3904 eV 282.40 nm f=0.0000 <S\*\*2>=12.551  
Excited State 37: 7.146-A 4.3905 eV 282.39 nm f=0.0000 <S\*\*2>=12.515  
Excited State 38: 7.226-A 4.3926 eV 282.26 nm f=0.0007 <S\*\*2>=12.803  
Excited State 39: 7.053-A 4.4525 eV 278.46 nm f=0.0001 <S\*\*2>=12.186  
Excited State 40: 7.066-A 4.4527 eV 278.45 nm f=0.0174 <S\*\*2>=12.231

**Table S2.** Crystallographic data of **1**.

|                                                                  |                                    |
|------------------------------------------------------------------|------------------------------------|
| Empirical formula                                                | $C_{50}H_{78}O_4N_{10}S_2Co_2$     |
| Formula weight                                                   | 1065.20                            |
| Temperature                                                      | 293(2)                             |
| Wavelength (Å)                                                   | 0.71073                            |
| Crystal system                                                   | Monoclinic                         |
| Space group                                                      | $P2_1/c$                           |
| $a$ , Å                                                          | 10.562(4)                          |
| $b$ , Å                                                          | 14.568(6)                          |
| $c$ , Å                                                          | 17.808(7)                          |
| $\beta$ , deg                                                    | 98.219(8)                          |
| Volume, Å <sup>3</sup>                                           | 2711.9(19)                         |
| $Z$                                                              | 2                                  |
| $D_{\text{calc}}$ (mg m <sup>-3</sup> )                          | 1.304                              |
| $\mu$ (Mo $K\alpha$ ) (mm <sup>-1</sup> )                        | 0.740                              |
| F(000)                                                           | 1132                               |
| Total reflections                                                | 28323                              |
| Unique reflections ( $R_{\text{int}}$ )                          | 4622 ( $R_{\text{int}} = 0.1010$ ) |
| Observed reflections [ $F_o > 4\sigma(F_o)$ ]                    | 3192                               |
| $R$ indices [ $F_o > 4\sigma(F_o)$ ] <sup>b</sup> $R_1$ , $wR_2$ | 0.0431, 0.0889                     |
| Goodness-of-fit on $F^{2a}$                                      | 1.004                              |
| Largest diff. Peak and hole, $e.\text{Å}^{-3}$                   | 0.262, -0.281                      |

<sup>a</sup>Goodness-of-fit  $S = [\sum w(F_o^2 - F_c^2)^2 / (n-p)]^{1/2}$ , where  $n$  is the number of reflections and  $p$  the number of parameters. <sup>b</sup> $R_1 = \sum \|F_o\| - \|F_c\| / \sum \|F_o\|$ ,  $wR_2 = [\sum w(F_o^2 - F_c^2)^2 / \sum w(F_o^2)^2]^{1/2}$
